# Supplementary material for: Long-chain surface-modified red-emitting carbon dots as fluorescent additives for 3D printing vat-photopolymerization
Source: Royal Society of Chemistry journal article supplement (doi:10.1039/d4na00617h), 2024-11-26
Supplement: d4na00617h1.pdf [file d4na00617h1.pdf]

## Supporting Information

### ***Long-chain surface-modified red-emitting carbon dots as fluorescent additives for 3D printing vat-photopolymerization***

Simone Maturi,<sup>a</sup> Andrea Baschieri,<sup>b</sup> Erica Locatelli,<sup>a</sup> Martina Buccioli,<sup>a</sup> Mauro Comes Franchini<sup>a</sup> and Letizia Sambri\*<sup>a</sup>

a) Department of Industrial Chemistry “Toso Montanari”, University of Bologna, Via Piero Gobetti 85, 40129 Bologna, Italy.

b) Institute for Organic Synthesis and Photoreactivity (ISOF), National Research Council of Italy (CNR), Via Piero Gobetti 101, 40129 Bologna, Italy

| Index                                                           | Pag. |
|-----------------------------------------------------------------|------|
| ELECTRON MICROSCOPY-TEM ANALYSIS.....                           | 2    |
| EMISSION SPECTRA OF RCDs IN WATER SOLUTION.....                 | 2    |
| ATR-FTIR SPECTRA.....                                           | 3    |
| REFLECTANCE SPECTRA OF PRINTED SAMPLES AND RCDs AND L-RCDs..... | 4    |
| EMISSION AND EXCITATION SPECTRA OF PRINTED SAMPLES.....         | 5    |
| TENSILE TESTS RESULTS.....                                      | 9    |
| PHOTOSTABILITY RESULTS.....                                     | 9    |

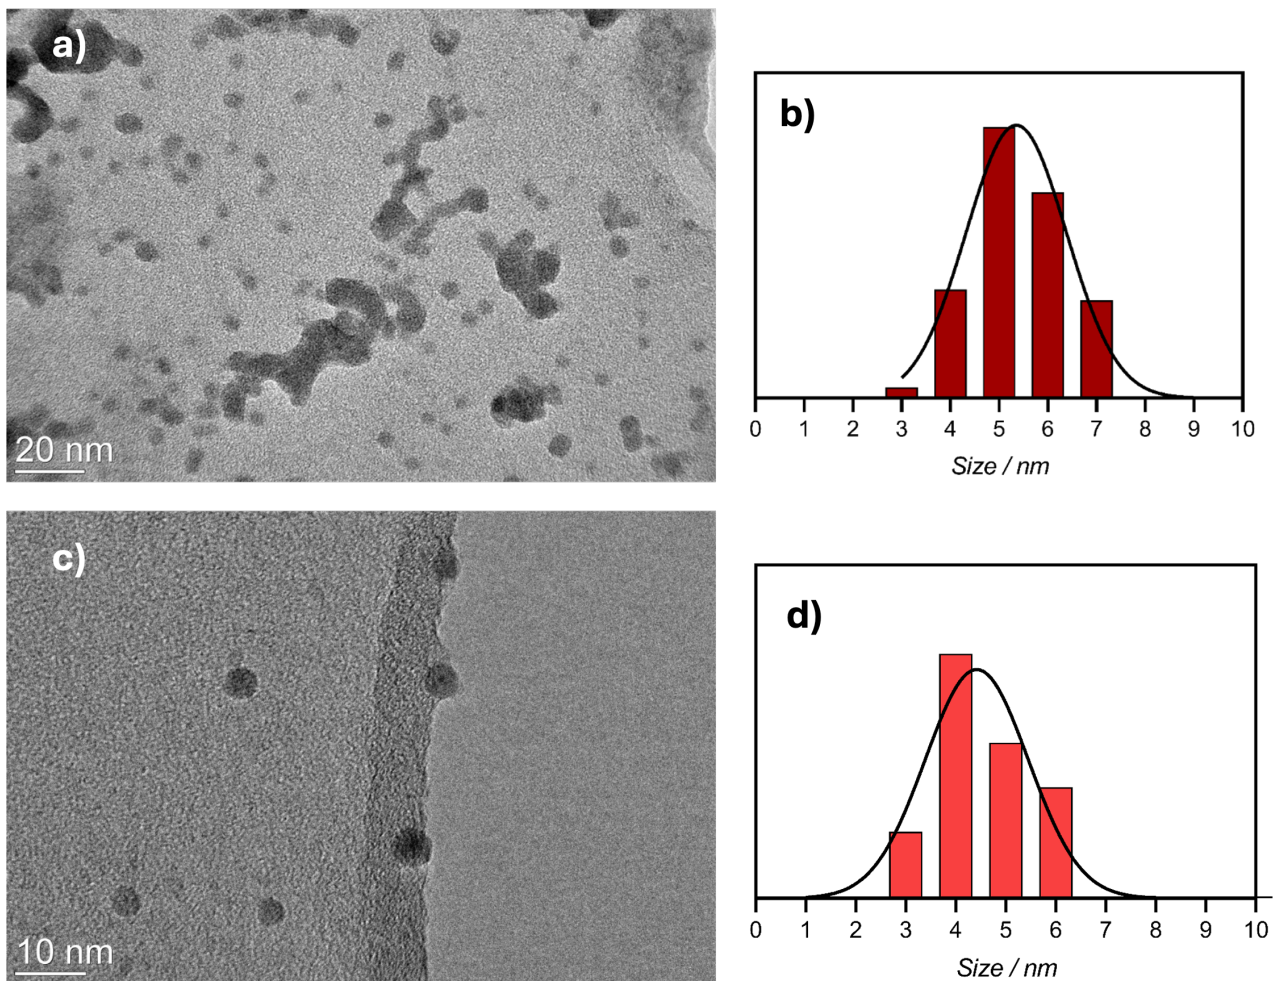

Fig. S1: A TEM image (a) of L-RCDs and their size distribution (b) showing an average diameter of 5.35 nm (SD=1.03); a TEM image of RCDs (c) and their size distribution (d) showing an average diameter of 4.42 nm (SD=1.03).

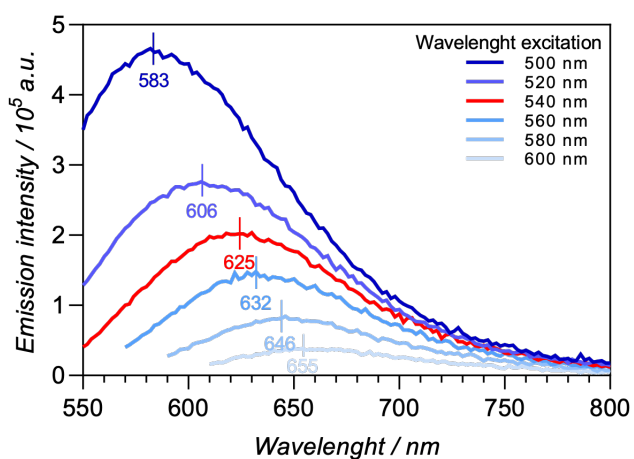

Fig. S2: Screening of the emission of RCDs in H<sub>2</sub>O solution exciting in the range 500-600 nm.

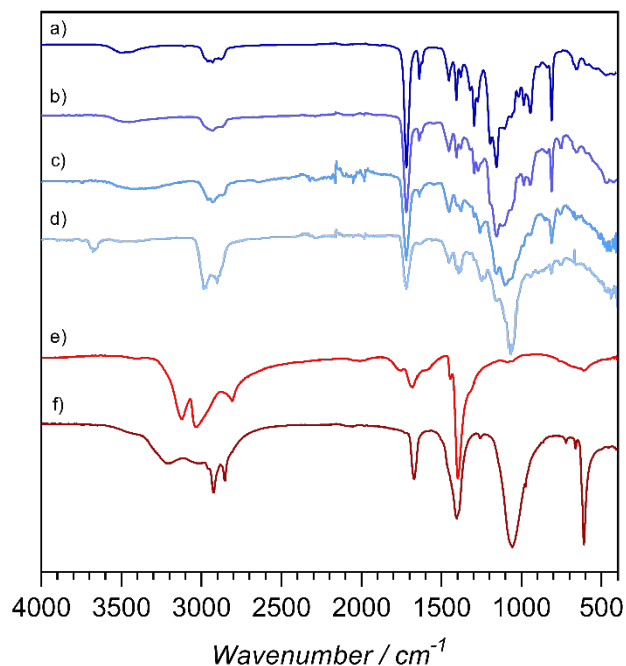

Fig. S3: ATR-FTIR spectra of the photocurable **Resin-R** before (a), after (b) the 3D printing process, printed **Resin-R** with the addition of 0.1% w/w of RCDs (c) and printed **Resin-R** with the addition of 0.1% w/w of L-RCDs (d). FT-IR spectra of the water solutions of RCDs (e) and L-RCDs (f) were added for comparison.

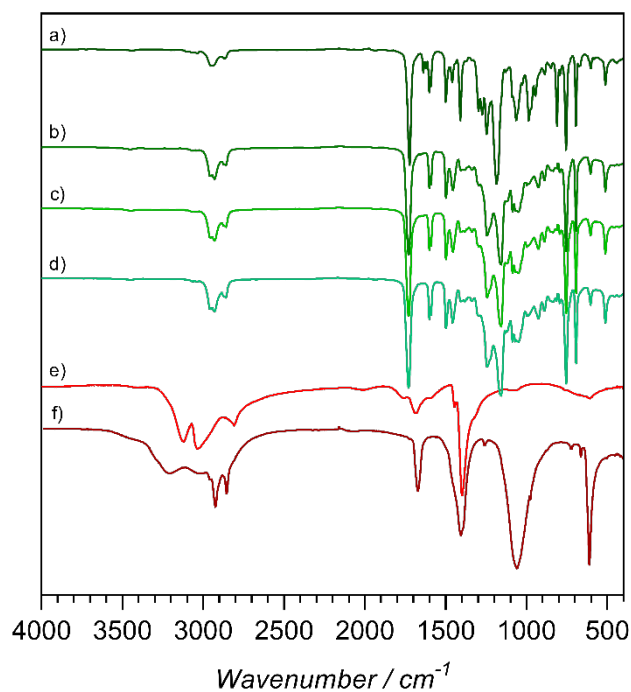

Fig. S4: ATR-FTIR spectra of the photocurable **Resin-F** before (a), after (b) the 3D printing process, printed **Resin-F** with the addition of 0.1% w/w of RCDs (c) and printed **Resin-F** with the addition of 0.1% w/w of L-RCDs (d). FT-IR spectra of the water solutions of RCDs (e) and L-RCDs (f) were added for comparison.

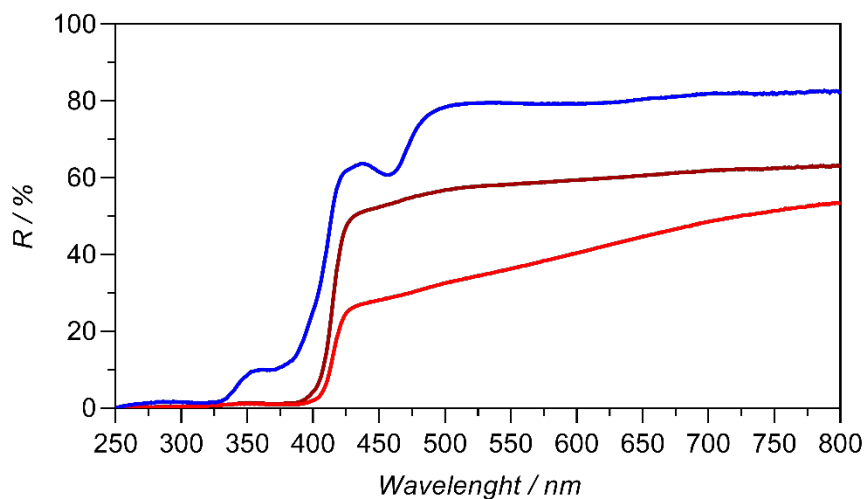

Fig. S5: Reflectance spectra of the pristine **Resin-R** (blue), **Resin-R@L-RCDs-0.1% w/w** (brown) and **Resin-R@RCDs-0.1 % w/w** (red).

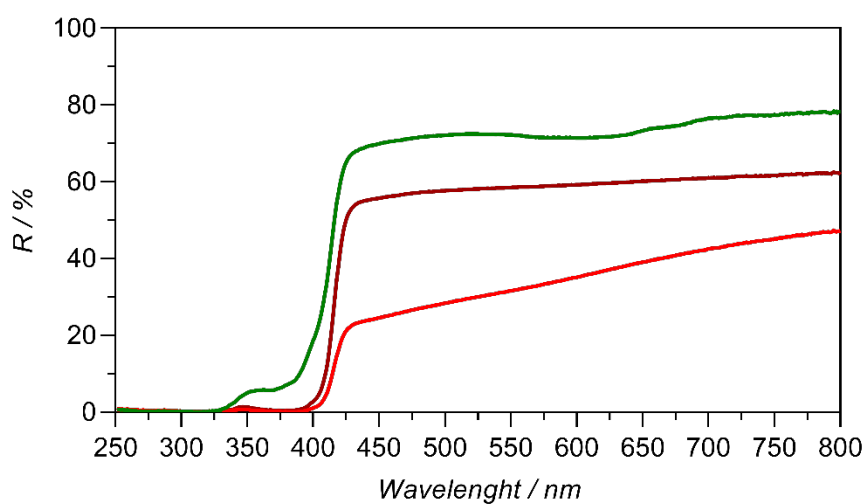

Fig. S6: Reflectance spectra of the pristine **Resin-F** (green), **Resin-F@L-RCDs-0.1% w/w** (brown) and **Resin-F@RCDs-0.1 % w/w** (red).

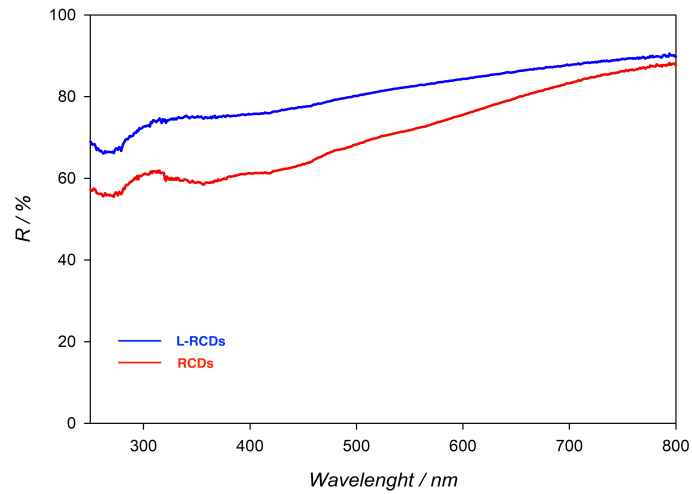

Fig. S7: Reflectance spectra of **L-RCDs** (blue) and **RCDs** (red).

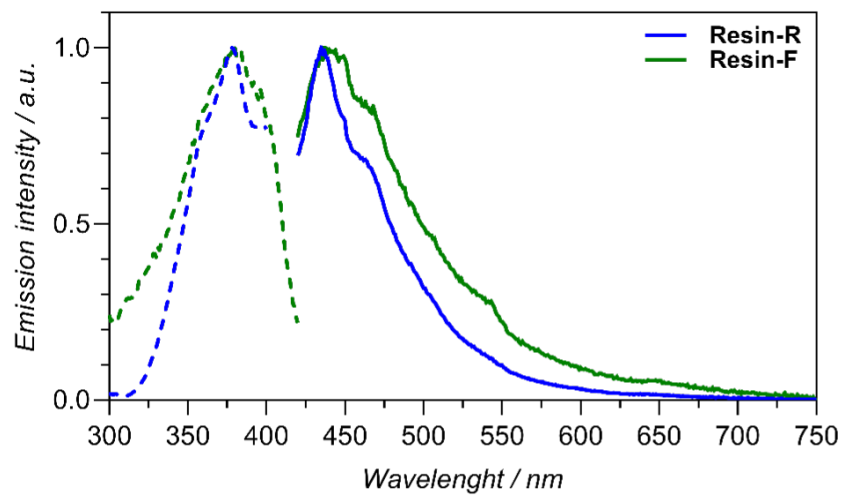

Fig. S8: Normalized excitation (dashed) and emission (solid) spectra of pristine printed **Resin-R** (blue) and **Resin-F** (green).

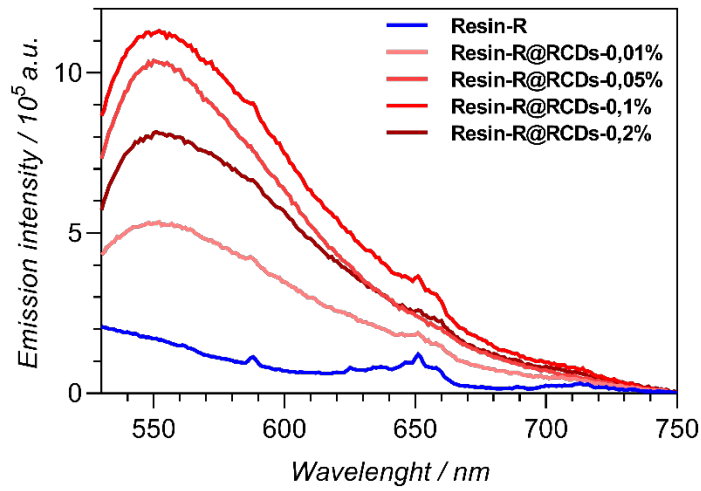

Fig. S9: Screening of the emission of **Resin-R@RCDs** in 0.01, 0.05, 0.1 and 0.2 % w/w ( $\lambda_{exc}=500$  nm).

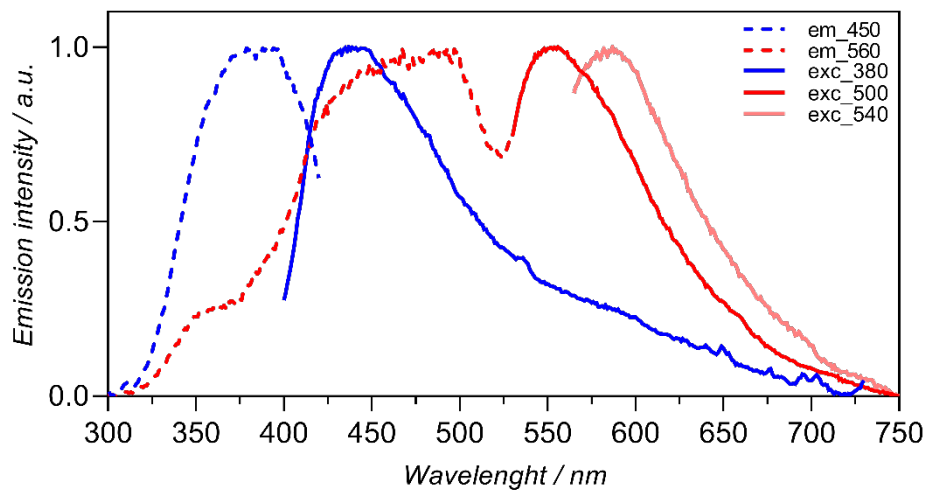

Fig. S10: Normalized excitation (dashed) and emission (solid) spectra of **Resin-R@RCDs-0.1%** w/w at different wavelengths.

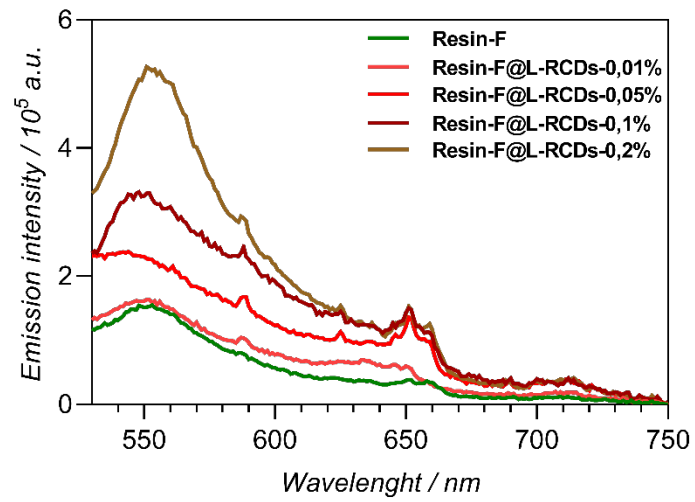

Fig. S11: Screening of the emission of **Resin-F@L-RCDs** in 0.01, 0.05, 0.1 and 0.2 % w/w ( $\lambda_{exc}=500$  nm).

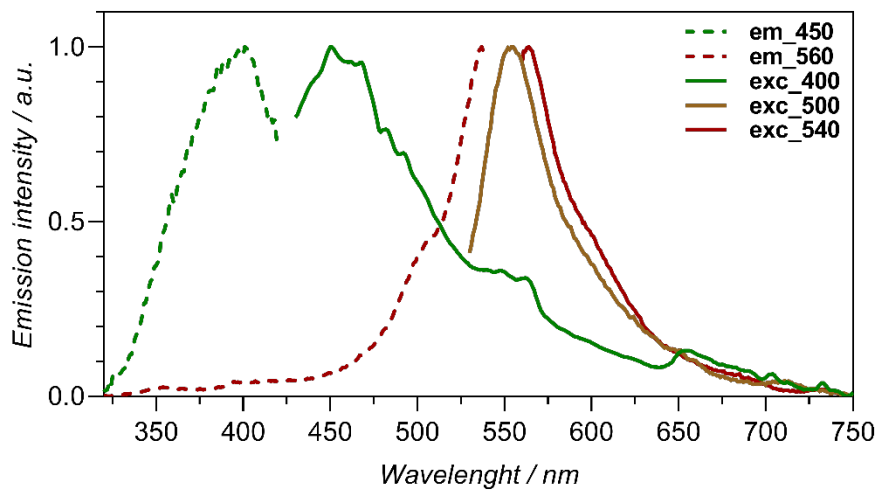

Fig. S12: Normalized excitation (dashed) and emission (solid) spectra of **Resin-F@L-RCDs-0.2%** at different wavelengths.

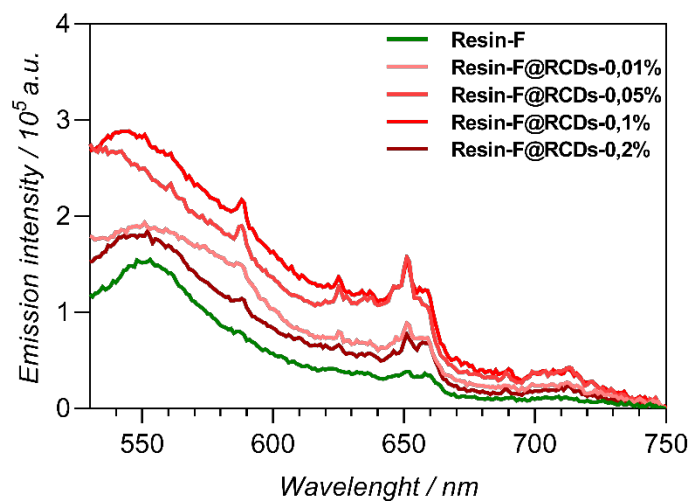

Fig. S13: Screening of the emission of **Resin-F@RCDs** in 0.01, 0.05, 0.1 and 0.2 % w/w ( $\lambda_{\text{exc}}=500$  nm).

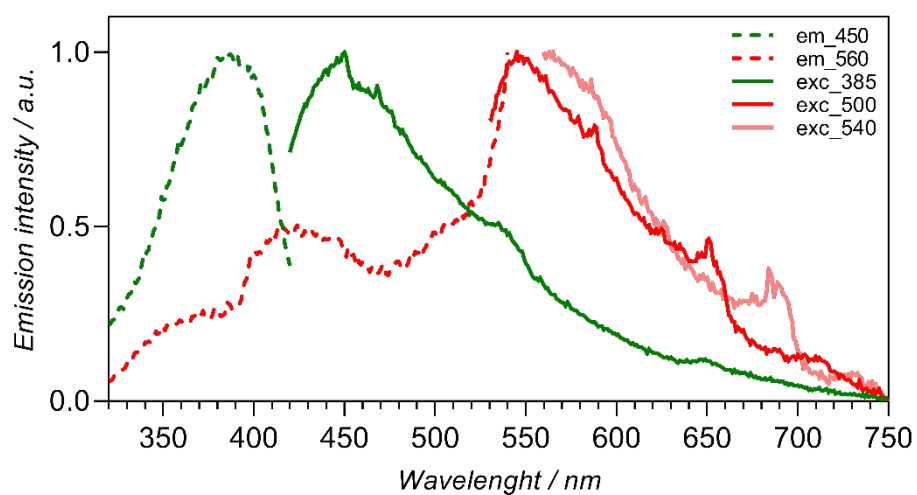

Fig. S14: Normalized excitation (dashed) and emission (solid) spectra of **Resin-F@RCDs-0.1%** w/w at different wavelengths.



| Resin_R                 |         |            |            |           |           |              |              |             |             |
|-------------------------|---------|------------|------------|-----------|-----------|--------------|--------------|-------------|-------------|
|                         | 0%      | 0,01% RCDs | 0,05% RCDs | 0,1% RCDs | 0,2% RCDs | 0,01% L-RCDs | 0,05% L-RCDs | 0,1% L-RCDs | 0,2% L-RCDs |
| Young's Modulus / MPa   | 1027±32 | 822±95     | 988±47     | 894±41    | 895±38    | 818±30       | 850±74       | 1092±65     | 954±56      |
| Elongation at break / % | 4.2±0,7 | 4±1        | 2,3±0,9    | 2,2±0,5   | 3±1       | 3±1          | 2,5±0,6      | 2,2±0,2     | 3,9±0,4     |
| Tensile strenght / MPa  | 31±3    | 30±5       | 19±2       | 17±3      | 24±7      | 27±8         | 19±4         | 22±1        | 31±4        |

| Resin_F                 |          |            |            |           |           |              |              |             |             |
|-------------------------|----------|------------|------------|-----------|-----------|--------------|--------------|-------------|-------------|
|                         | 0%       | 0,01% RCDs | 0,05% RCDs | 0,1% RCDs | 0,2% RCDs | 0,01% L-RCDs | 0,05% L-RCDs | 0,1% L-RCDs | 0,2% L-RCDs |
| Young's Modulus / MPa   | 12,4±0,7 | 12,8±0,2   | 10±1       | 11,5±0,3  | 13,0±0,3  | 12,3±0,5     | 13±1         | 11,0±0,1    | 12±1        |
| Elongation at break / % | 17,1±0,8 | 16,3±0,6   | 12±2       | 14,2±0,8  | 16±1      | 19±1         | 18±1         | 17±1        | 16,5±0,8    |
| Tensile strenght / MPa  | 2,0±0,1  | 2,0±0,1    | 1,4±0,3    | 1,5±0,1   | 2,0±0,2   | 2,3±0,3      | 2,3±0,2      | 1,9±0,2     | 2,0±0,1     |

Fig. S15: Tensile tests results of the printed objects.

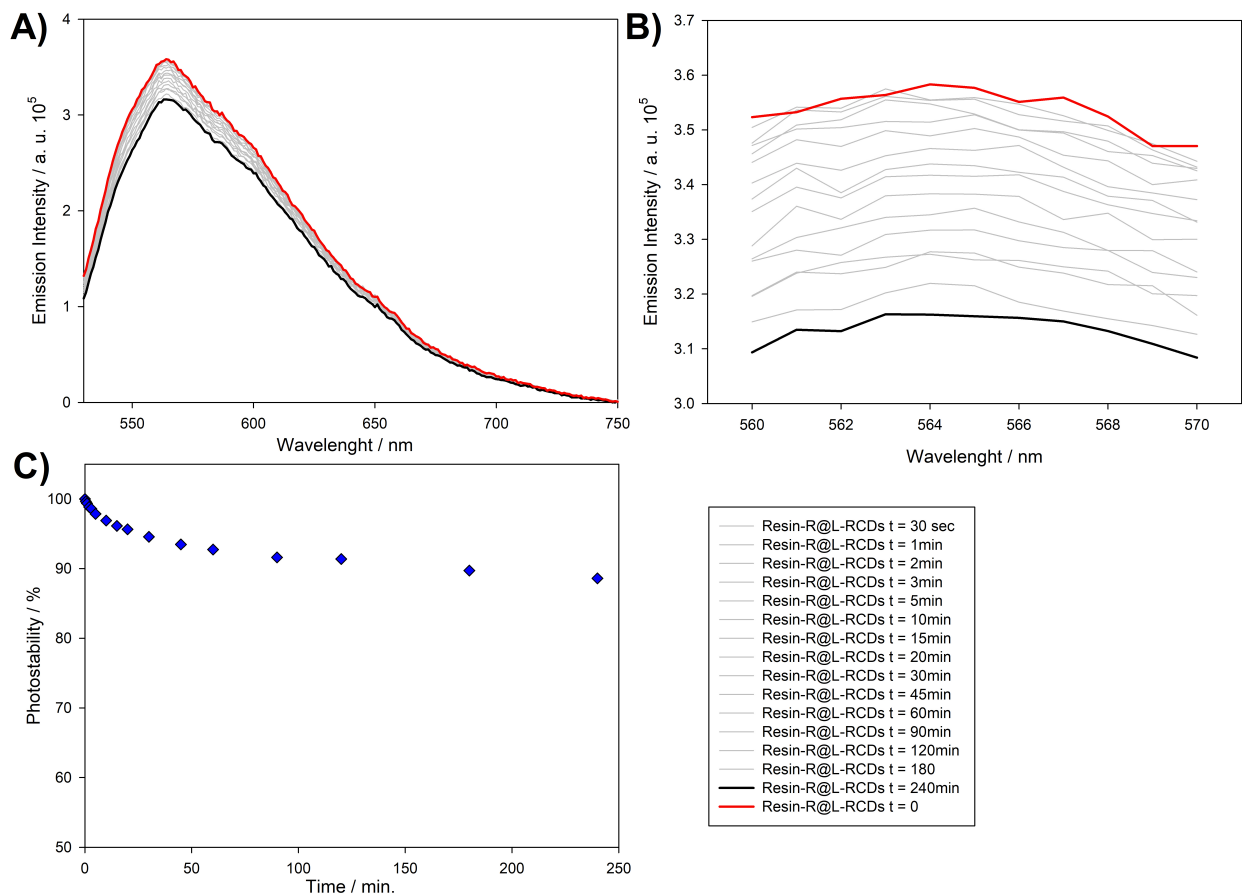

Fig. S16: Photostability test of Resin-R containing 0.2% of L-RCDs irradiated at 405 nm with a curing oven (LED power = 9.1 W).
